# Supplementary material for: The Effects of Sorbus aucuparia L. Fruit Extracts on Oxidative/Nitrative Modifications of Human Fibrinogen, Impact on Enzymatic Properties of Thrombin, and Hyaluronidase Activity In Vitro
Source: MDPI journal article supplement (doi:10.3390/antiox10122009), 2021-12-18
Supplement: s1 [file s1]

## Supplementary materials:

# The Effects of *Sorbus aucuparia* L. Fruit Extracts on Oxidative/Nitrative Modifications of Human Fibrinogen, Impact on Enzymatic Properties of Thrombin, and Hyaluronidase Activity In Vitro

Magdalena Rutkowska<sup>1,\*</sup> Joanna Kolodziejczyk-Czepas<sup>2</sup> and Monika Anna Olszewska<sup>1</sup>

<sup>1</sup> Department of Pharmacognosy, Faculty of Pharmacy, Medical University of Lodz, 1 Muszynskiego St., 90-151 Lodz, Poland; monika.olszewska@umed.lodz.pl

<sup>2</sup> Department of General Biochemistry, Faculty of Biology and Environmental Protection, University of Lodz, 141/143 Pomorska St., 90-236 Lodz, Poland; joanna.kolodziejczyk@biol.uni.lodz.pl

\* Correspondence: magdalena.rutkowska@umed.lodz.pl

## Materials and Methods

### *Effects on Oxidative/Nitrative Modifications of Fibrinogen*

SDS-PAGE analysis of the ONOO<sup>-</sup>-induced changes in the isolated fibrinogen was performed according to Marchelak et al.[19] using a Mini-Protean Electrophoresis Cell (Bio-Rad) and 4-20% Mini-PROTEAN TGX Precast Gels (Bio-Rad). The running buffer was composed of 10x Tris/Glycine/SDS running buffer (Bio-Rad, Hercules, CA, USA) and deionized water (1:9, *v/v*). The protein was stained using a mixture of 0.125% (*w/v*) Coomassie Brilliant Blue R250 (Thermo Scientific, Waltham, MA USA), 10% (*v/v*) acetic acid, 50% (*v/v*) methanol, and deionised water. Then, the Coomassie dye was removed by aspiration, and gels were covered with the destaining solution (10% acetic acid, 25% methanol, deionized water), which was changed several times until the background staining was removed.

Western-blot analysis of the ONOO<sup>-</sup>-induced changes in the blood plasma fibrinogen was performed using 4-15% Mini-PROTEAN TGX Precast Gels (Bio-Rad) as described above for SDS-PAGE analysis, but without the staining and destaining steps [19]. The electrophoretic transfer onto Immobilon<sup>®</sup>-P polyvinylidene fluoride (PVDF) membrane (Sigma-Aldrich) was performed using the Mini Trans-Blot Cell (Bio-Rad). The membrane was activated by wetting in methanol for 5 seconds and then rinsing with deionised water. The transfer buffer was a mixture of 25 mM Tris, 192 mM glycine, 20% (*v/v*) methanol, 0.05% (*w/v*) SDS and deionized water (pH 8.3). The overnight transfer in a Mini Trans-Blot Module (Bio-Rad) was carried out at 4°C, 30 V. The membrane was blocked for 1.5 h with 5% defatted dry milk solutions in TBS-T, and incubated for 1 h with the 1:5000 dilution of Goat Anti-Fibrinogen Antibody (Sigma-Aldrich). The membrane was washed six times for 5 min each with TBS-T, incubated for 1 h with the 1:5000 dilution of Rabbit Anti-Goat IgG H&L (HRP) Secondary Antibody (Abcam, Cambridge, UK), and then washed again. The bands corresponding to fibrinogen were visualised by luminol-enhanced chemiluminescence (ECL) system and recorded on the X-ray film.

The molecular weight (MW) on SDS-PAGE and Western Blots was estimated with the Precision Protein Plus Dual Colour standards (Bio-Rad). The MW of an unknown band was determined using a standard curve of the log (MW) versus the retention factors  $R_f$  of the standards. The strong linear relationship ( $r > 0.99$ ,  $p < 0.05$ ) between the protein MW and migration distances confirmed the reliability in predicting MW. Densitometric analysis was performed with ImageJ software (National Institutes of Health, Bethesda, MA, USA; Version 1.53e).

## Results

**Table S1.** Correlation coefficients (*r*) and probability (*p*) values of the linear relationships between phenolic contents of *S. aucuparia* fruit extracts and their activity parameters.

| <i>r(p)</i> for:       | Total phenolics | Total mono- and dicaffeoylquinic acids | Total other hydroxycinnamic acid derivatives | Total hydroxybenzoic acid derivatives | Total flavonoids | Total oligomeric and polymeric proanthocyanidins |
|------------------------|-----------------|----------------------------------------|----------------------------------------------|---------------------------------------|------------------|--------------------------------------------------|
| SDS-PAGE               | 0.9728          | 0.9097                                 | 0.9587                                       | 0.5716                                | <b>0.7900</b>    | 0.1321                                           |
| HMW                    | (0.000)*        | (0.000)*                               | (0.000)*                                     | (0.052)                               | <b>(0.002)*</b>  | (0.682)                                          |
| SDS-PAGE               | 0.9580          | 0.8896                                 | 0.9420                                       | 0.5607                                | <b>0.7915</b>    | 0.1735                                           |
| Aα                     | (0.000)*        | (0.000)*                               | (0.000)*                                     | (0.058)                               | <b>(0.002)*</b>  | (0.590)                                          |
| SDS-PAGE               | 0.8402          | 0.7746                                 | 0.8352                                       | 0.5089                                | <b>0.7187</b>    | 0.1198                                           |
| Bβ                     | (0.001)*        | (0.003)*                               | (0.001)*                                     | (0.091)                               | <b>(0.008)*</b>  | (0.711)                                          |
| SDS-PAGE γ             | 0.8776          | 0.8027                                 | 0.8479                                       | 0.4788                                | <b>0.7481</b>    | 0.3331                                           |
|                        | (0.000)*        | (0.002)*                               | (0.000)*                                     | (0.115)                               | <b>(0.005)*</b>  | (0.290)                                          |
| Western blot           | 0.7962          | 0.7261                                 | 0.7970                                       | 0.4495                                | <b>0.7406</b>    | 0.1857                                           |
| HMW                    | (0.002)*        | (0.008)*                               | (0.002)*                                     | (0.143)                               | <b>(0.006)*</b>  | (0.563)                                          |
| Tyrosine nitration     | 0.9538          | 0.9517                                 | 0.9395                                       | 0.3830                                | <b>0.7403</b>    | 0.1126                                           |
|                        | (0.000)*        | (0.000)*                               | (0.000)*                                     | (0.219)                               | <b>(0.006)*</b>  | (0.728)                                          |
| APTT                   | 0.0042          | -0.0095                                | 0.0486                                       | 0.0662                                | 0.1009           | -0.1991                                          |
|                        | (0.990)         | (0.977)                                | (0.881)                                      | (0.835)                               | (0.755)          | (0.535)                                          |
| PT                     | -0.3547         | -0.3379                                | -0.3624                                      | -0.0013                               | -0.4545          | -0.3008                                          |
|                        | (0.258)         | (0.283)                                | (0.247)                                      | (0.997)                               | (0.138)          | (0.342)                                          |
| TT                     | 0.6034          | 0.5345                                 | 0.6188                                       | 0.4015                                | <b>0.5952</b>    | 0.0671                                           |
|                        | (0.038)*        | (0.073)                                | (0.032)*                                     | (0.196)                               | <b>(0.041)*</b>  | (0.836)                                          |
| Amidolytic activity    | 0.7098          | 0.6101                                 | 0.6761                                       | 0.2650                                | <b>0.7786</b>    | <b>0.6999</b>                                    |
|                        | (0.010)*        | (0.035)*                               | (0.016)*                                     | (0.405)                               | <b>(0.003)*</b>  | <b>(0.011)*</b>                                  |
| Proteolytic activity   | 0.7267          | 0.6109                                 | 0.6830                                       | 0.3669                                | <b>0.7424</b>    | <b>0.6674</b>                                    |
|                        | (0.007)*        | (0.035)*                               | (0.014)*                                     | (0.241)                               | <b>(0.006)*</b>  | <b>(0.018)*</b>                                  |
| Fibrin density         | 0.6721          | 0.6701                                 | 0.6650                                       | 0.0471                                | <b>0.6943</b>    | 0.4280                                           |
|                        | (0.017)*        | (0.017)*                               | (0.018)*                                     | (0.884)                               | <b>(0.012)*</b>  | (0.165)                                          |
| Hyaluronidase activity | 0.7599          | 0.5809                                 | 0.6785                                       | 0.8375                                | 0.0609           | -0.8275                                          |
|                        | (0.240)         | (0.419)                                | (0.321)                                      | (0.162)                               | (0.939)          | (0.172)                                          |

Activity and concentration parameters according to Fig. 1–5, S1 and Table 1–2. For correlation studies, the activity parameters were calculated as the percentage of the increase (SDS-PAGE bands intensity for Aα, Bβ, and γ chains; and APTT, PT, and TT) or the decrease (SDS-PAGE bands intensity for HMW aggregates; Western blot HMW intensity; tyrosine nitration; amidolytic and proteolytic activity of thrombin; and fibrin density), depending on the desired effect on the tested parameter in the samples treated with the investigated extracts versus the ONOO<sup>-</sup>-treated plasma in the absence of the analytes (for SDS-PAGE, Western blot and C-ELISA assays) or control samples (for blood clotting times and thrombin activity tests). The influence on hyaluronidase activity was expressed as equivalents of HP per extract dry weight (mg HP/mg dw). Asterisks mean statistical significance of the estimated linear relationships (\**p* < 0.05). All statistically significant correlations are printed in bold.

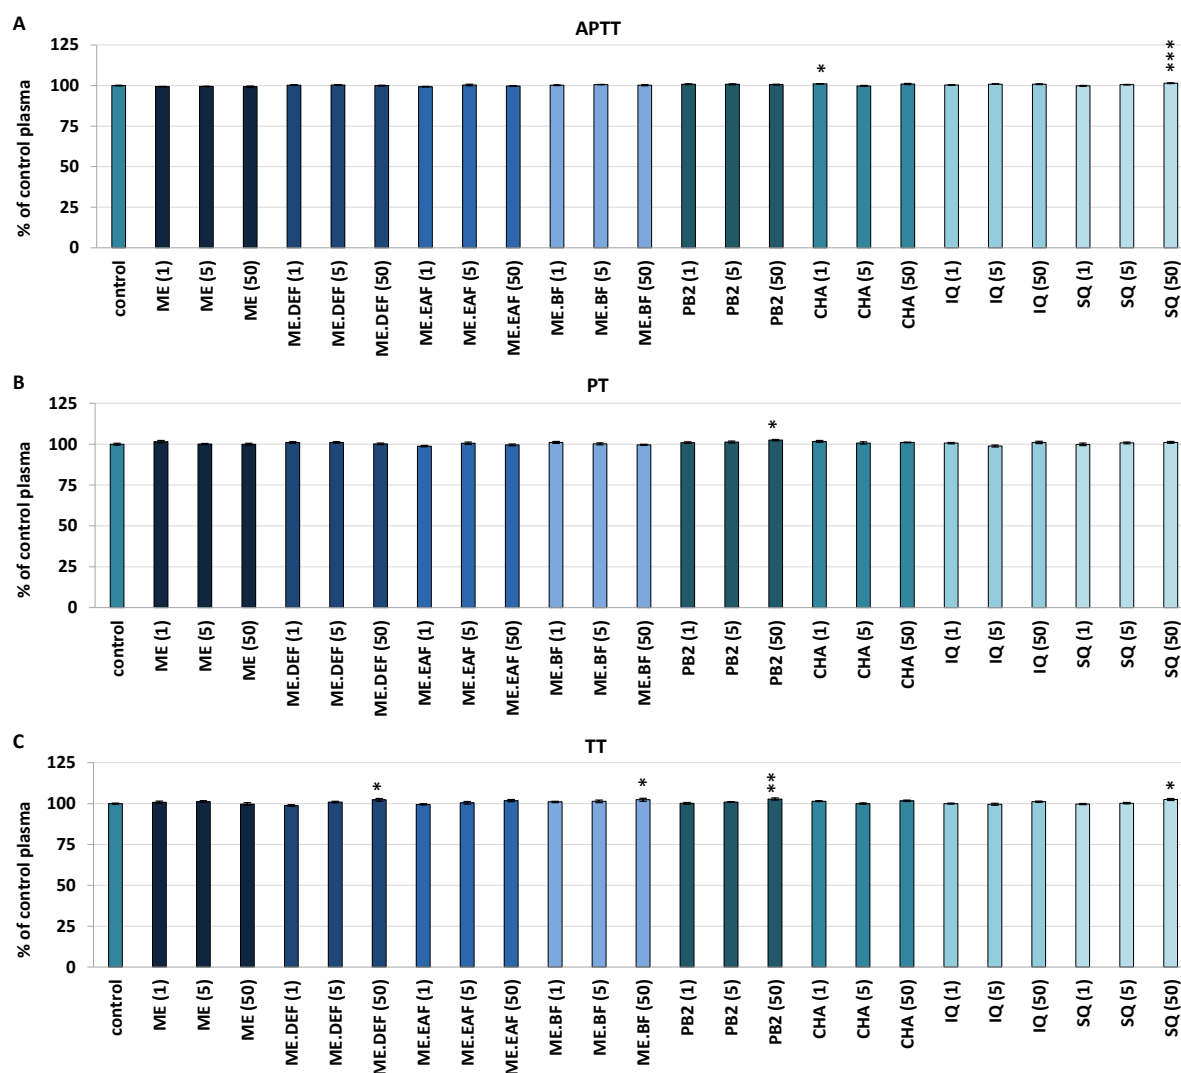

**Figure S1.** The effects of *S. aucuparia* fruit extracts and their model constituents on blood clotting times of human plasma: activated partial thromboplastin time, APTT (A); prothrombin time, PT (B); and thrombin time, TT (C). The clotting times were monitored in seconds (s) and calculated as % of the control plasma time assumed as 100%. Results are presented as means  $\pm$  SE ( $n = 10$ ). Statistical differences: \*  $p < 0.05$ , \*\*  $p < 0.01$ , and \*\*\*  $p < 0.001$  for samples in the presence of the analytes (1, 5, 50  $\mu\text{g/mL}$ ) versus control plasma. ME, defatted methanol–water extract (1:1,  $v/v$ ); ME.DEF, diethyl ether fraction of ME; ME.EAF, ethyl acetate fraction of ME; ME.BF, *n*-butanol fraction of ME; IQ, isoquercitrin; SQ, quercetin 3-*O*- $\beta$ -sophoroside; PB2, procyanidin B2; CHA, chlorogenic acid. The clotting times for the reference compound, argatroban (ARG, 0.5  $\mu\text{g/mL}$ ) were as follow: APTT,  $77.27 \pm 7.17$  s (168% of the value for control plasma); PT,  $20.93 \pm 1.43$  s (132% of control plasma); TT,  $140.71 \pm 12.88$  s (831% of control plasma).

### Experiment 1

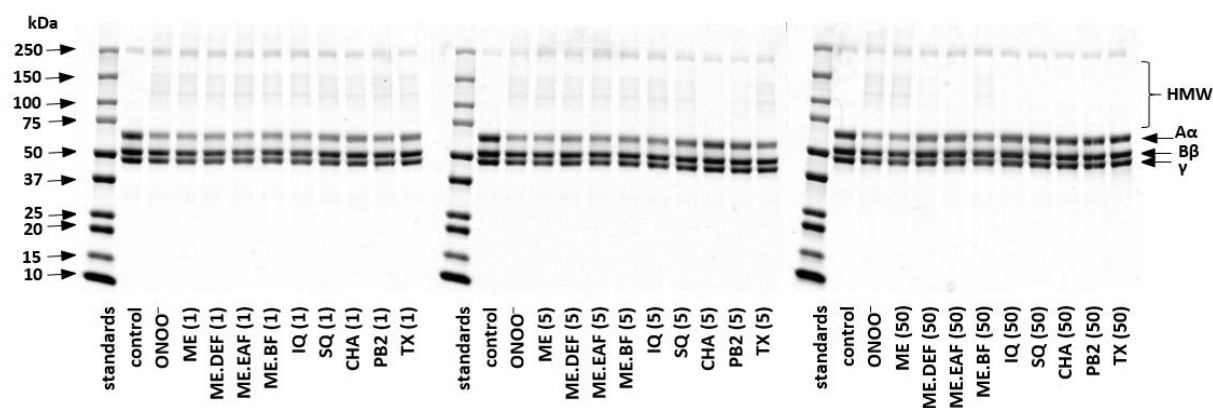

### Experiment 2

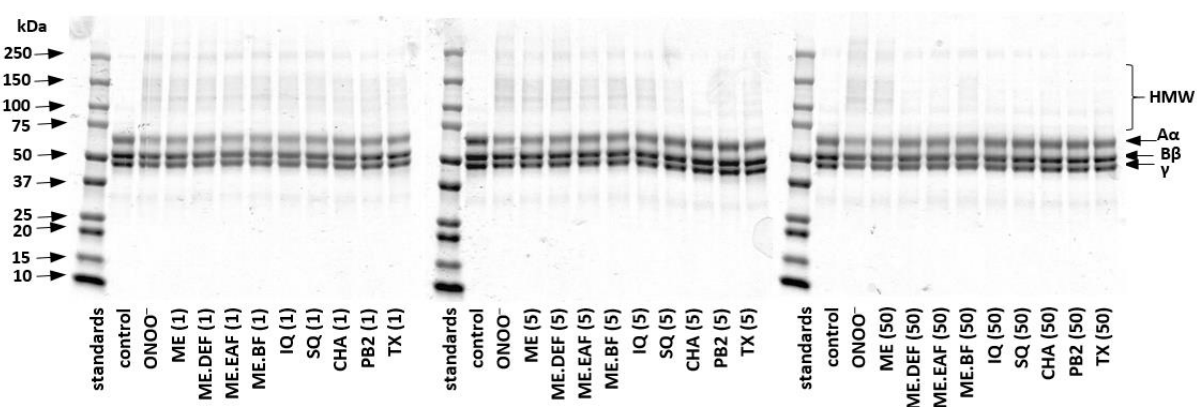

### Experiment 3

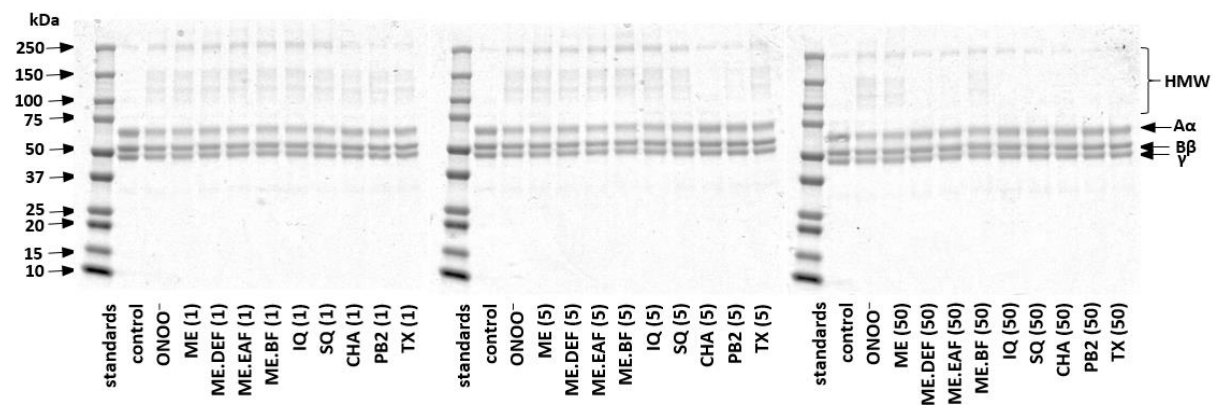

**Figure S2.** Raw images of all electrophoresis gels (SDS-PAGE). For detail information see Manuscript Figure 1.

## Experiment 1

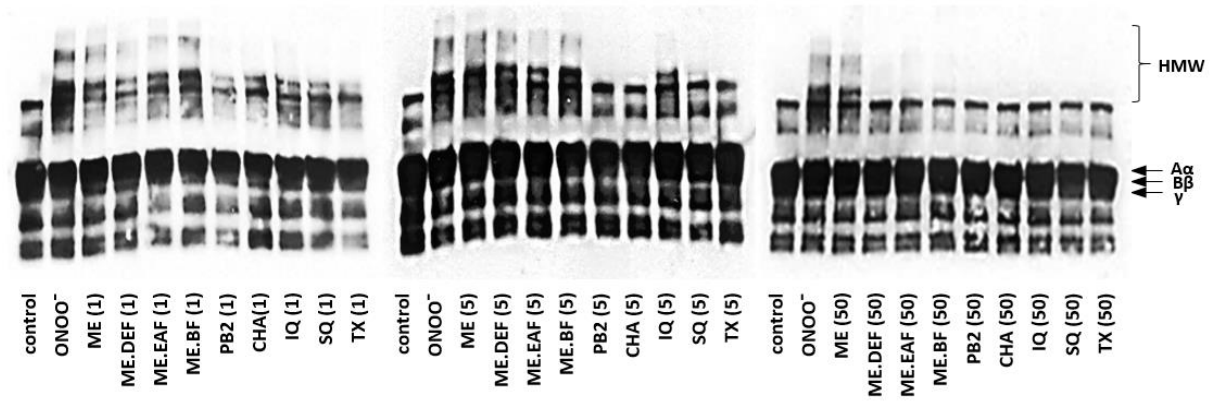

## Experiment 2

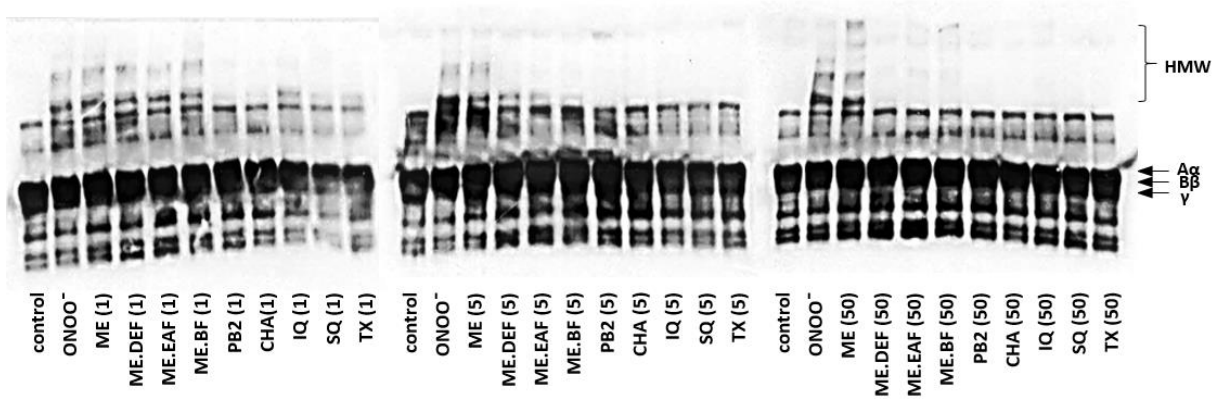

## Experiment 3

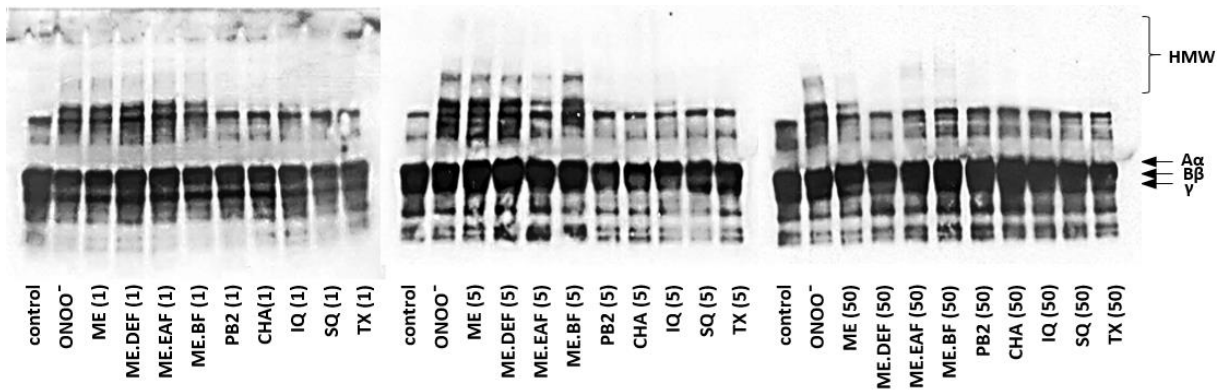

**Figure S3.** Raw images of all Western blots. For detail information see Manuscript Figure 2.
